# Supplementary material
Source: PubMed Central journal article supplement (PMC5167657)

**Appendix**  
**A Cluster Randomized Trial of a Personalized Multi-Condition Risk Assessment in Primary Care**  
**Haas et al.**

**Appendix A.** Sample Provider Schedule Indicating Whether a Patient Had Reported Risk Factor Data

| Time           | Status | Clinic | Patient Name                                                                                                         | Sex/Age | Visit Type |
|----------------|--------|--------|----------------------------------------------------------------------------------------------------------------------|---------|------------|
| TEST,VIEW,M.D. |        |        |                                                                                                                      |         |            |
| 10:00 - 10:20  |        | H      | <a href="#">BWHLMRHMTEST.SIX</a>    | F 50    | NEW        |
| 11:00 - 11:10  |        | H      | <a href="#">BWHLMRHMTEST.EIGHT</a>  | F 51    | NEW        |
| 11:00 - 11:10  |        | H      | <a href="#">BWHLMRHMTEST.EIGHTEEN</a>                                                                                | F 81    | NEW        |
| 12:00 - 12:10  |        | H      | <a href="#">BWHLMRHMTEST.NINETEEN</a>                                                                                | F 66    | NEW        |
| 13:00 - 13:10  |        | H      | <a href="#">BWHLMRHMTEST.FOUR</a>   | F 41    | NEW        |

Go to Patient Entered Data Queue

Appendix B. Sample Health Risk Appraisal

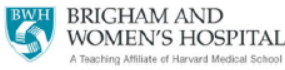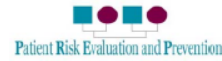

Name: Lucy Snoopy  
Generated On 5/22/2013

**Your Health Snapshot**

**How is Your Health Risk Determined?**

The graph below shows your estimated risk based on your answers to the questions you answered about your health behavior and family history. *If you have skipped some of the questions, these estimates may be less accurate.*

**Your Risk**

You have Much Above Average risk for **Breast Cancer**, Below Average risk for **Colon Cancer** and **Diabetes**, and Much Below Average risk for **Heart Disease**

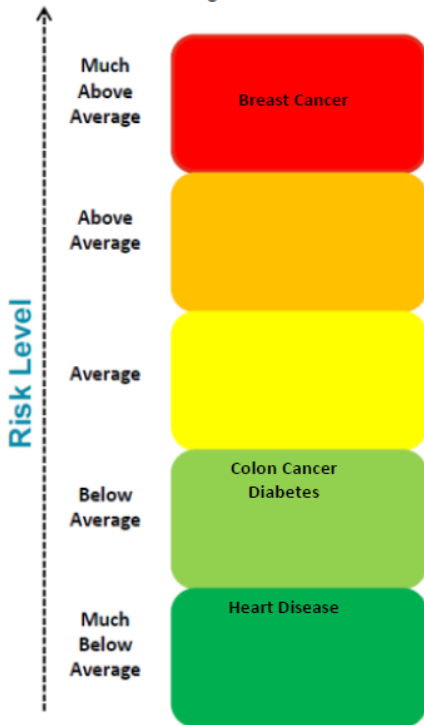

**Major things you can do to improve your health:**

1. Achieve and maintain a healthy weight.
2. Eat a healthy diet low in red meat to reduce your risk of colorectal cancer.
3. Eat a healthy diet including fish two or more times per week to reduce your risk of heart disease

**Keep up the good work. You're already doing these things to stay healthy:**

1. You exercise regularly.
2. Maintain your healthy blood pressure.
3. Maintain your cholesterol level.
4. You eat whole grains (like whole wheat bread, brown rice, oatmeal or popcorn) most days.
5. You eat at least 3 servings of fruits and vegetables most days.
6. You eat nuts on most days.

**My Watch List**

In addition to your disease risk, you should also keep track of these factors that are important to your health and well-being.

**Talk to Your Doctor**

Because you have a family history of heart disease, be sure to talk to your doctor about your risk. Because you have a family history of cancer, be sure to talk to your doctor about your risk.

**Weight**

Losing some weight would improve your health and help you feel better overall. As little as 5 pounds can have real benefit. Talk to a doctor for some tips.

For more information about any of these conditions visit: <http://www.yourdiseaserisk.wustl.edu/>

Copyright © 2013, Brigham and Women's Hospital

**Appendix**  
**A Cluster Randomized Trial of a Personalized Multi-Condition Risk Assessment in Primary Care**  
**Haas et al.**

**Appendix C. CONSORT Diagram**

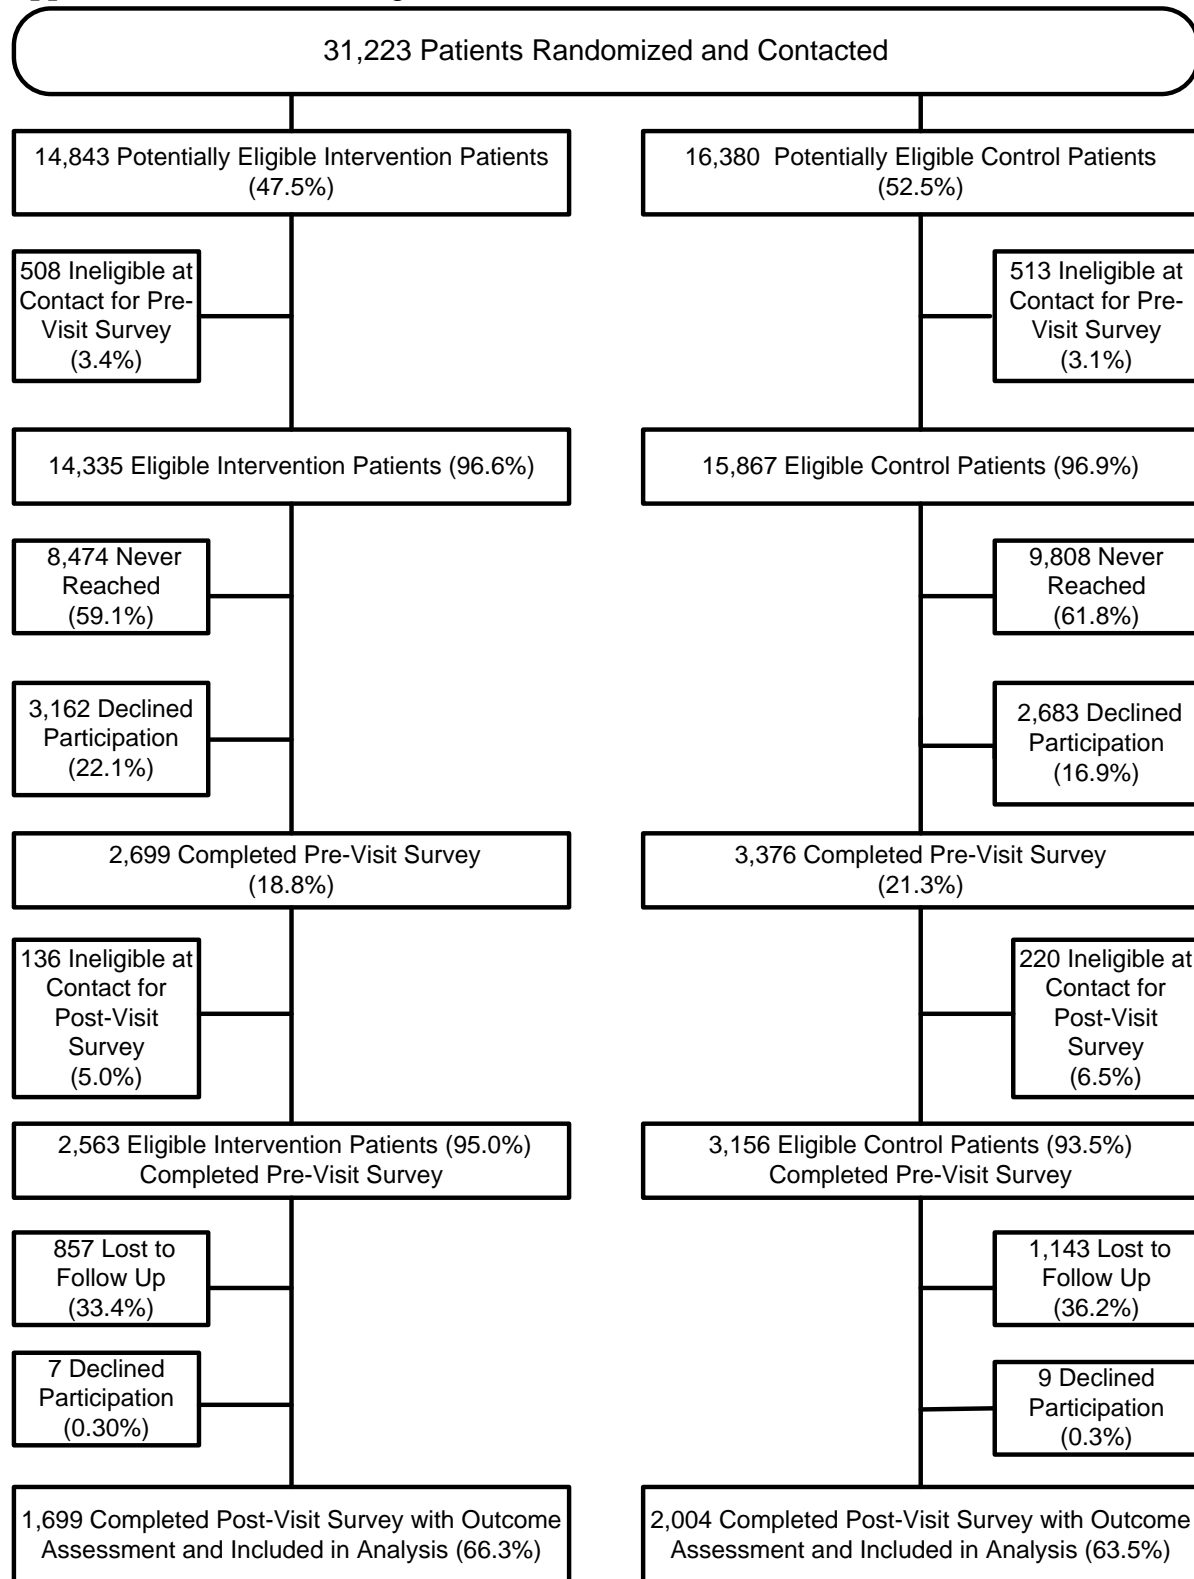

Supplement: NIHMS816886-supplement.pdf [file NIHMS816886-supplement.pdf]
